# Supplementary material for: The Potential Use of Moringa peregrina Seeds and Seed Extract as a Bio-Coagulant for Water Purification
Source: MDPI journal article supplement (doi:10.3390/w15152804), 2023-08-03
Supplement: s1 [file s1]

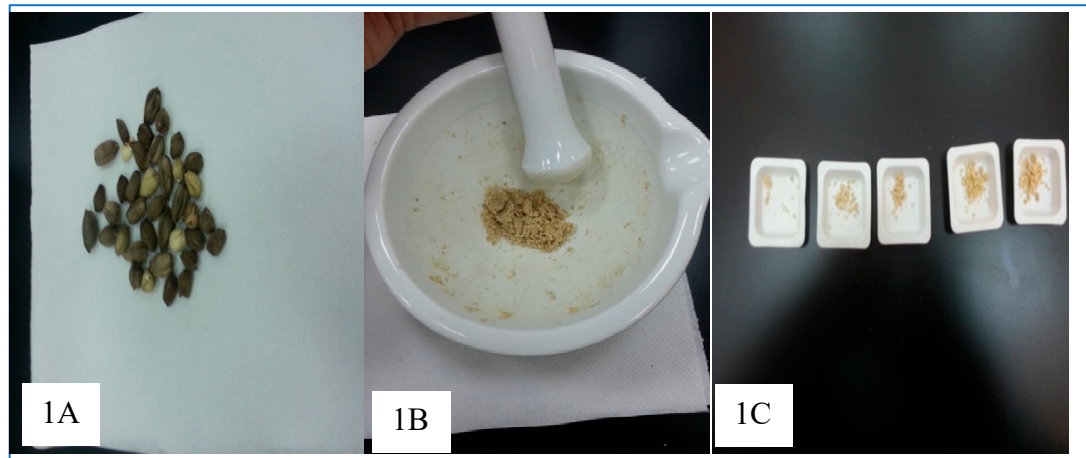

**Figure S1. Stages of *Moringa Peregrina* preparations: (1A) Raw seeds as collected, (1B) deshelled and crushed seeds, (1C) Powder seeds used for coagulation experiment.**
