# Supplementary figures and images for: The Potential Use of Moringa peregrina Seeds and Seed Extract as a Bio-Coagulant for Water Purification
Source: MDPI journal article supplement (doi:10.3390/w15152804), 2023-08-03

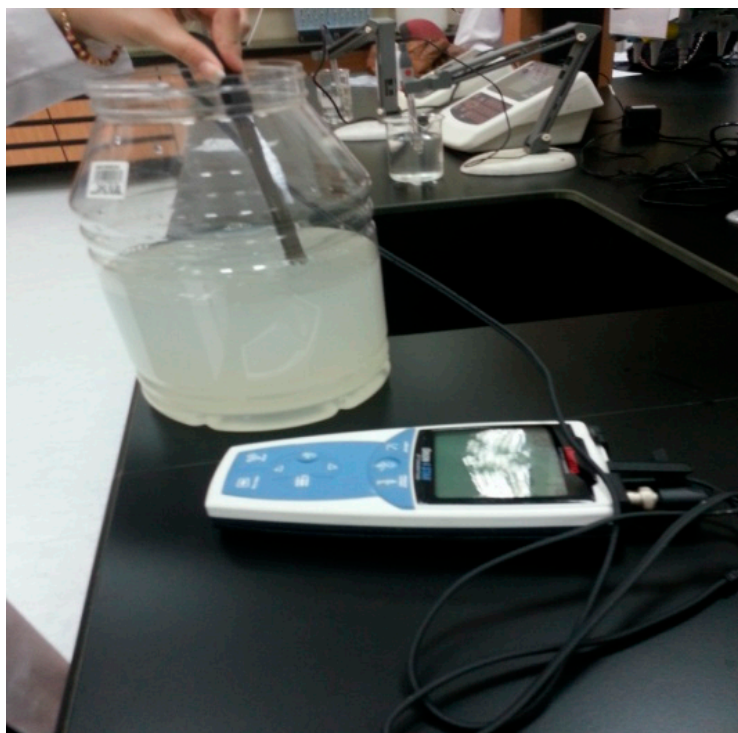

**Figure S2. Stock solution with turbidity used for the coagulation experiment.**

Supplement: s1 [file s1]
